# Supplementary material for: Improved binding affinity and interesting selectivities of aminopyrimidine-bearing carbohydrate receptors in comparison with their aminopyridine analogues
Source: Royal Society of Chemistry journal article supplement (doi:10.1039/c5ob01757b), 2015-01-01
Supplement: c5ob01757b1.pdf [file c5ob01757b1.pdf]

## Supporting Information

### Improved Binding Affinity and Interesting Selectivities of Aminopyrimidine-Bearing Carbohydrate Receptors in Comparison with their Aminopyridine Analogues

Jan Lippe, Wilhelm Seichter and Monika Mazik\*

Institut für Organische Chemie, Technische Universität Bergakademie Freiberg,

Leipziger Straße 29, 09596 Freiberg, Germany

[monika.mazik@chemie.tu-freiberg.de](mailto:monika.mazik@chemie.tu-freiberg.de)

1. Representative WinEQNMR plots (Figures S1-S6)
2. Representative HypNMR plots (Figures S7-S9)
3. Representative mole ratio plots (Figures S10-S12)
4.  $^1\text{H}$  NMR titrations of compound **8**, **10**, **12** and **14** with the tested carbohydrates (Figures S13 and S14)
5. Molecular modelling calculations (Figure S15)
6. Crystallographic data (Tables S1 and S2, Figure S16)
7.  $^1\text{H}$  and  $^{13}\text{C}$  NMR spectra of compounds **8-10** and **12-14** (Figures S17-32)

**1** Plots of the chemical shifts of the receptor resonances as a function of added carbohydrate (WinEQNMR program).

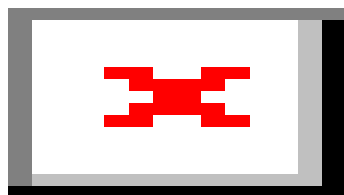

**Figure S1.** Plot of the observed chemical shifts of the NH resonances of **12** as a function of added  $\beta$ -galactoside **23** in  $\text{CDCl}_3$  (1:1 and 1:2 receptor-sugar binding model).

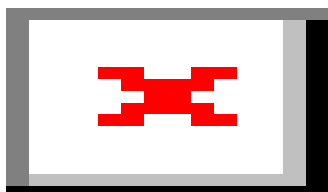

**Figure S2.** Plot of the observed chemical shifts of the pyrimidine CH resonances of **8** as a function of added  $\beta$ -glucoside **22** in  $\text{CDCl}_3$  (1:1 and 2:1 receptor-sugar binding model).

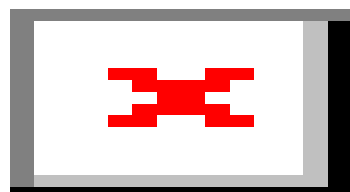

**Figure S3.** Plot of the observed chemical shifts of the Pyrimidin-CH resonances of **8** as a function of added  $\beta$ -galactoside **23** in  $\text{CDCl}_3$  (1:1 and 2:1 receptor-sugar binding model).

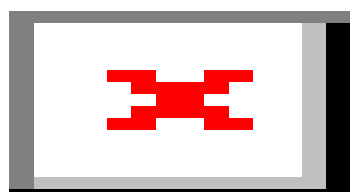

**Figure S4.** Plot of the observed chemical shifts of the pyrimidine CH resonances of **10** as a function of added  $\beta$ -glucoside **22** in 5/95  $\text{DMSO-d}_6/\text{CDCl}_3$  v/v (1:1 and 1:2 receptor-sugar binding model).

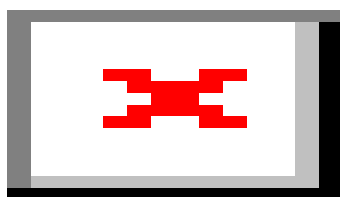

**Figure S5.** Plot of the observed chemical shifts of the pyrimidine CH resonances of **10** as a function of added  $\beta$ -galactoside **23** in  $\text{CDCl}_3$  (1:1 and 1:2 receptor-sugar binding model).

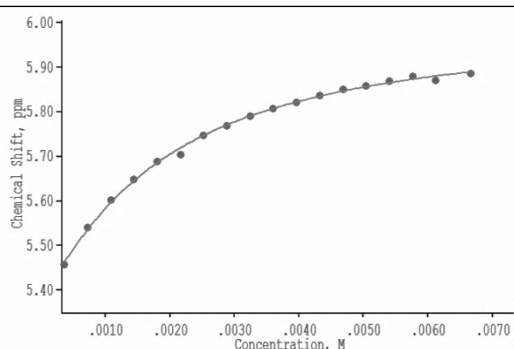

**Figure S6.** Plot of the observed chemical shifts of the NH resonances of **14** as a function of added  $\beta$ -galactoside **23** in  $\text{CDCl}_3$  (1:1 and 1:2 receptor-sugar binding model).

## 2 Representative HypNMR plots.

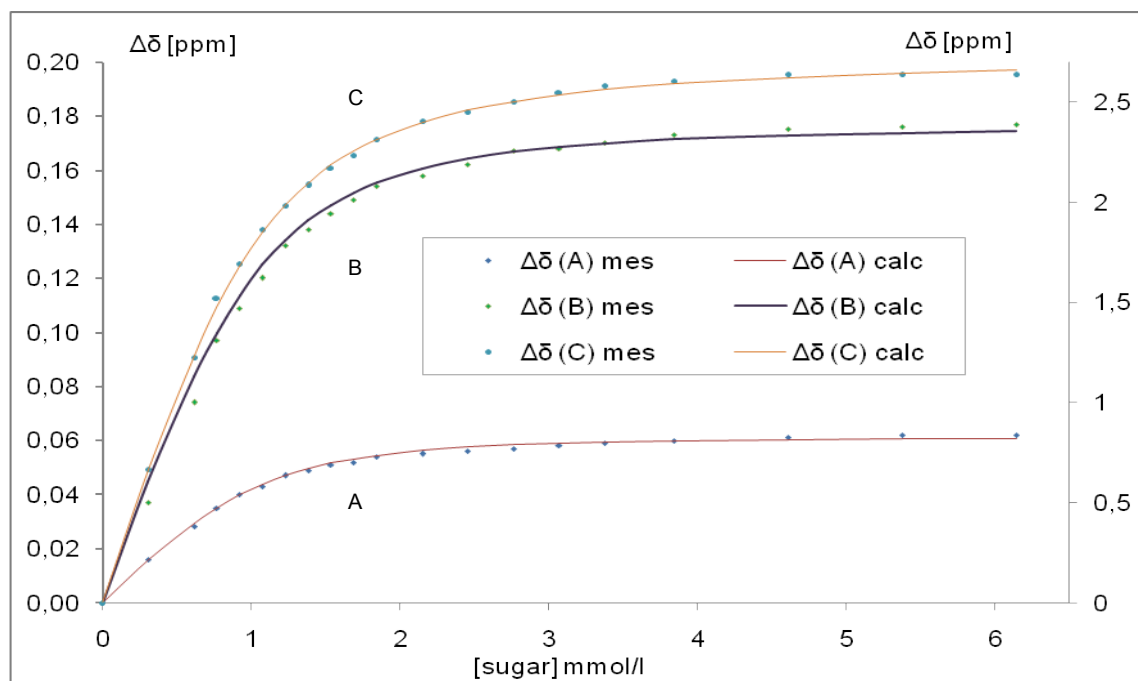

**Figure S7.** Plot of the calculated (line) and experimental (points)  $\Delta\delta$  of pyrimidine CH (A), CHNH (B) and NH (C) signals of **8** as a function of added  $\beta$ -glucoside **22** in 5/95  $\text{DMSO-d}_6/\text{CDCl}_3$  (v/v). All signals are fitted simultaneously. For a better representation a secondary axis is used for C.

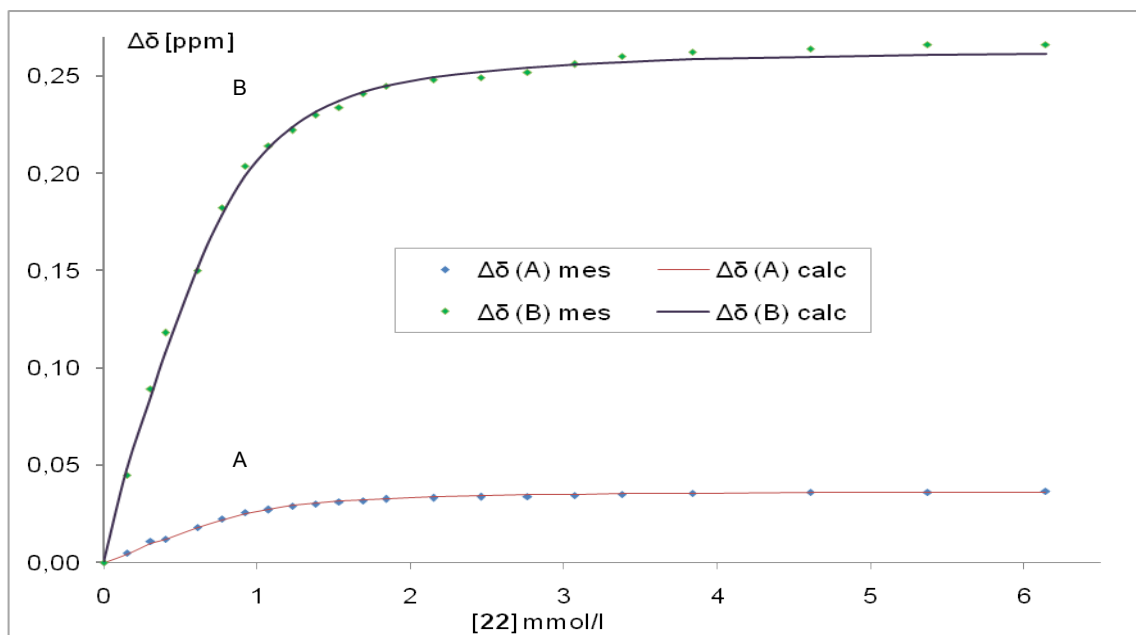

**Figure S8.** Plot of the calculated (line) and experimental (points)  $\Delta\delta$  of pyrimidine *CH* (A) and *CHNH* (B) signals of **10** as a function of added  $\beta$ -glucoside **22** in 5/95 DMSO- $d_6$ /CDCl $_3$  (v/v). All signals are fitted simultaneously.

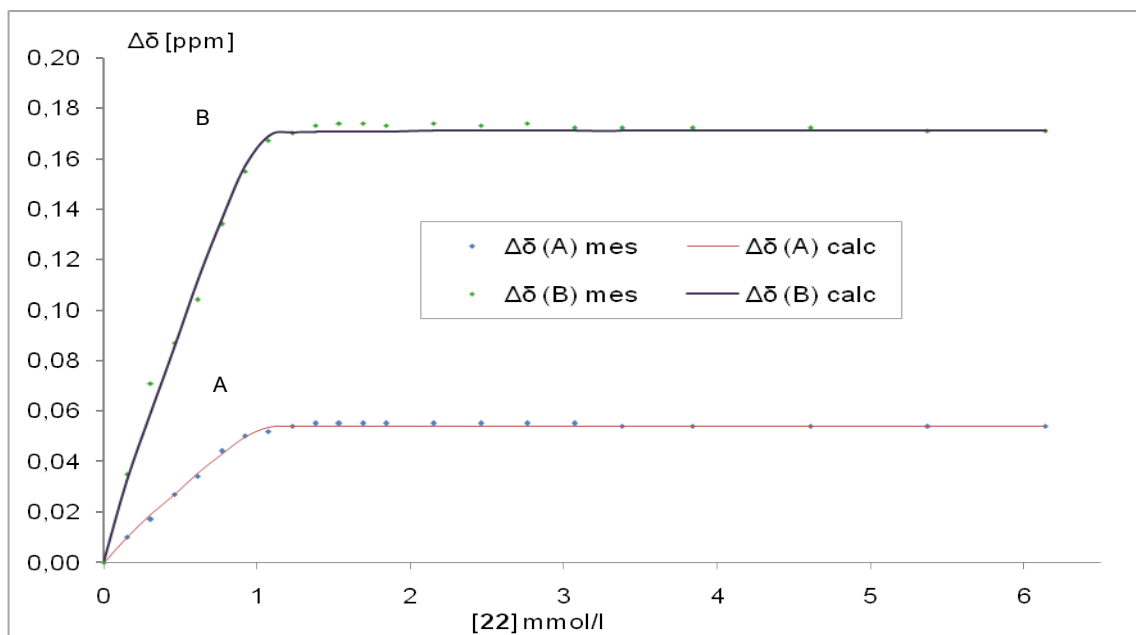

**Figure S9.** Plot of the calculated and experimental  $\Delta\delta$  of pyrimidine *CH* (A) and *CHNH* (B) signals of **8** as a function of added  $\beta$ -glucoside **22** in CDCl $_3$ ; the signals are fitted simultaneously. The binding constants were too large to be accurately determined by the NMR method.

### 3 Representative mole ratio plots.

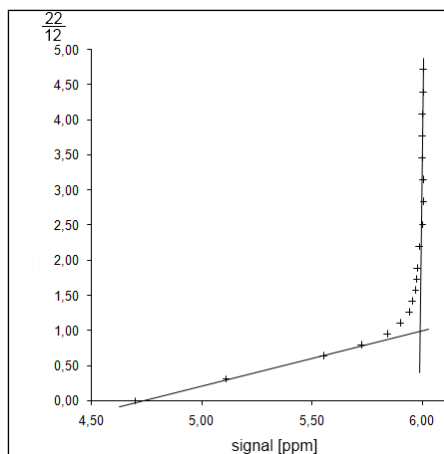

**Figure S10.** Mole ratio plot: Titration of compound **12** with  $\beta$ -glucopyranoside **22** in  $\text{CDCl}_3$  (analysis of the complexation-induced shift of the NH signal of **12**).

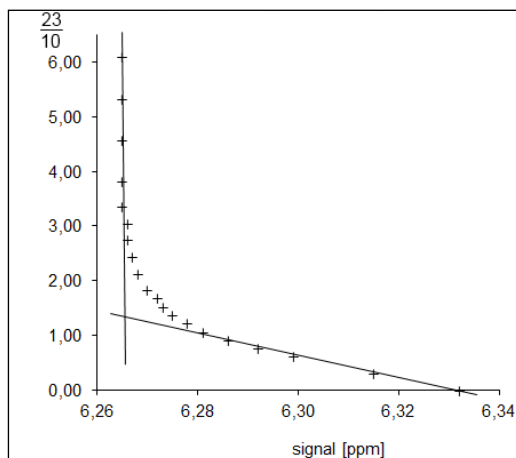

**Figure S11.** Mole ratio plot: Titration of compound **10** with  $\beta$ -galactopyranoside **23** in  $\text{CDCl}_3$  (analysis of the complexation-induced shift of the pyrimidine CH signal of **10**).

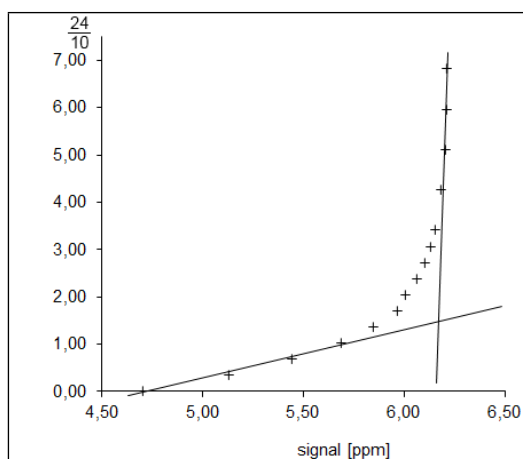

**Figure S12.** Mole ratio plot: Titration of compound **8** with  $\alpha$ -glucopyranoside **24** in  $\text{CDCl}_3$  (analysis of the complexation-induced shift of the NH signal of **8**).

4  $^1\text{H}$  NMR titrations of compounds **8**, **10**, **12** and **14** with the tested carbohydrates (examples).

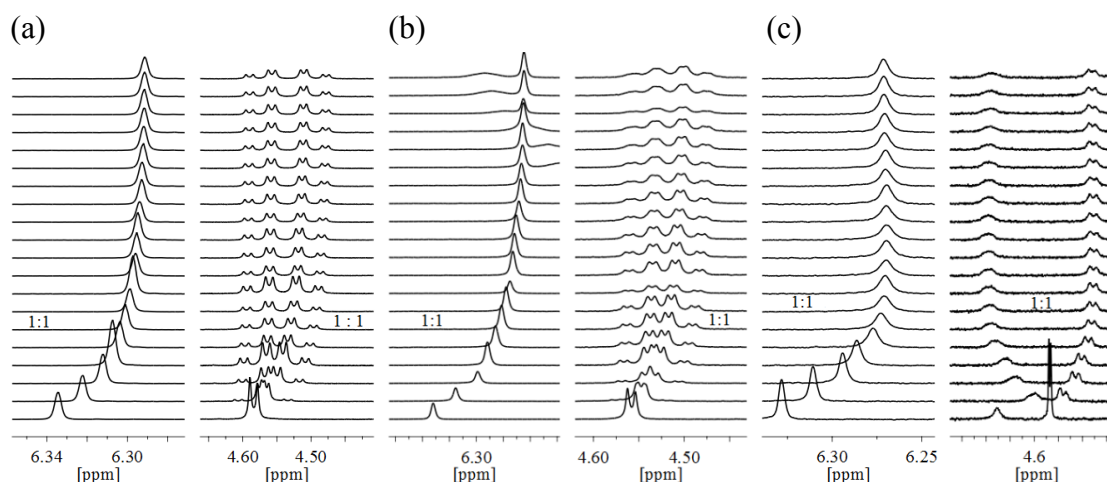

**Figure S13.** Partial  $^1\text{H}$  NMR spectra of receptors (a) **12**, (b) **10**, and (c) **8** before (bottom) and after the addition of  $\beta$ -galactoside **23** in  $\text{CDCl}_3$ ; (a)  $[\mathbf{12}] = 1.05$  mM, equiv. of **23**: 0.00-4.76; (b)  $[\mathbf{10}] = 1.00$  mM, equiv. of **23**: 0.00-6.00; (c)  $[\mathbf{8}] = 1.02$  mM, equiv. of **23**: 0.00-5.46. Shown are (from left to right) the pyrimidine CH and the  $\text{CH}_2$  signals of the corresponding receptor.

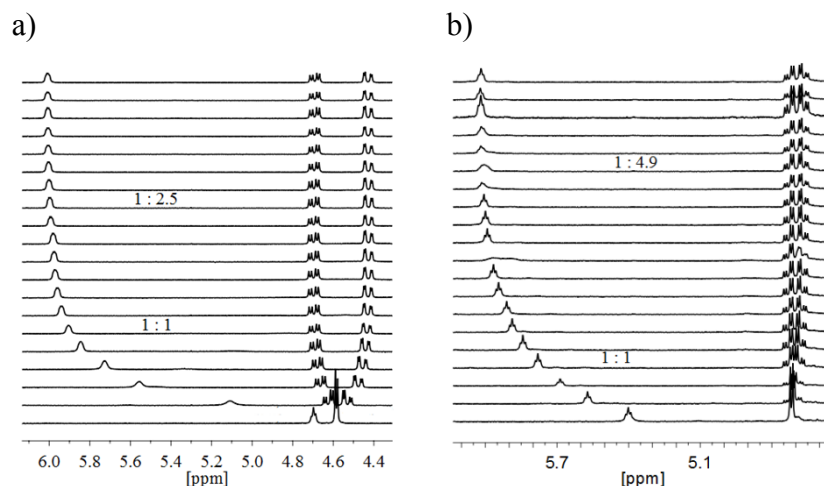

**Figure S14.** Partial  $^1\text{H}$  NMR spectra of (a) the triethylbenzene-based receptor **12** and (b) the trimethoxybenzene-based **14** after addition of 0.00-4.70 or 0.00-5.18 equiv  $\beta$ -glucopyranoside **22**, respectively, in  $\text{CDCl}_3$ ;  $[\mathbf{12}] = 1.06$  mM,  $[\mathbf{14}] = 1.02$  mM]. Shown are the  $\text{NH-CH}_2$  signals of the corresponding receptor.

## 5 Molecular modelling calculations (examples).

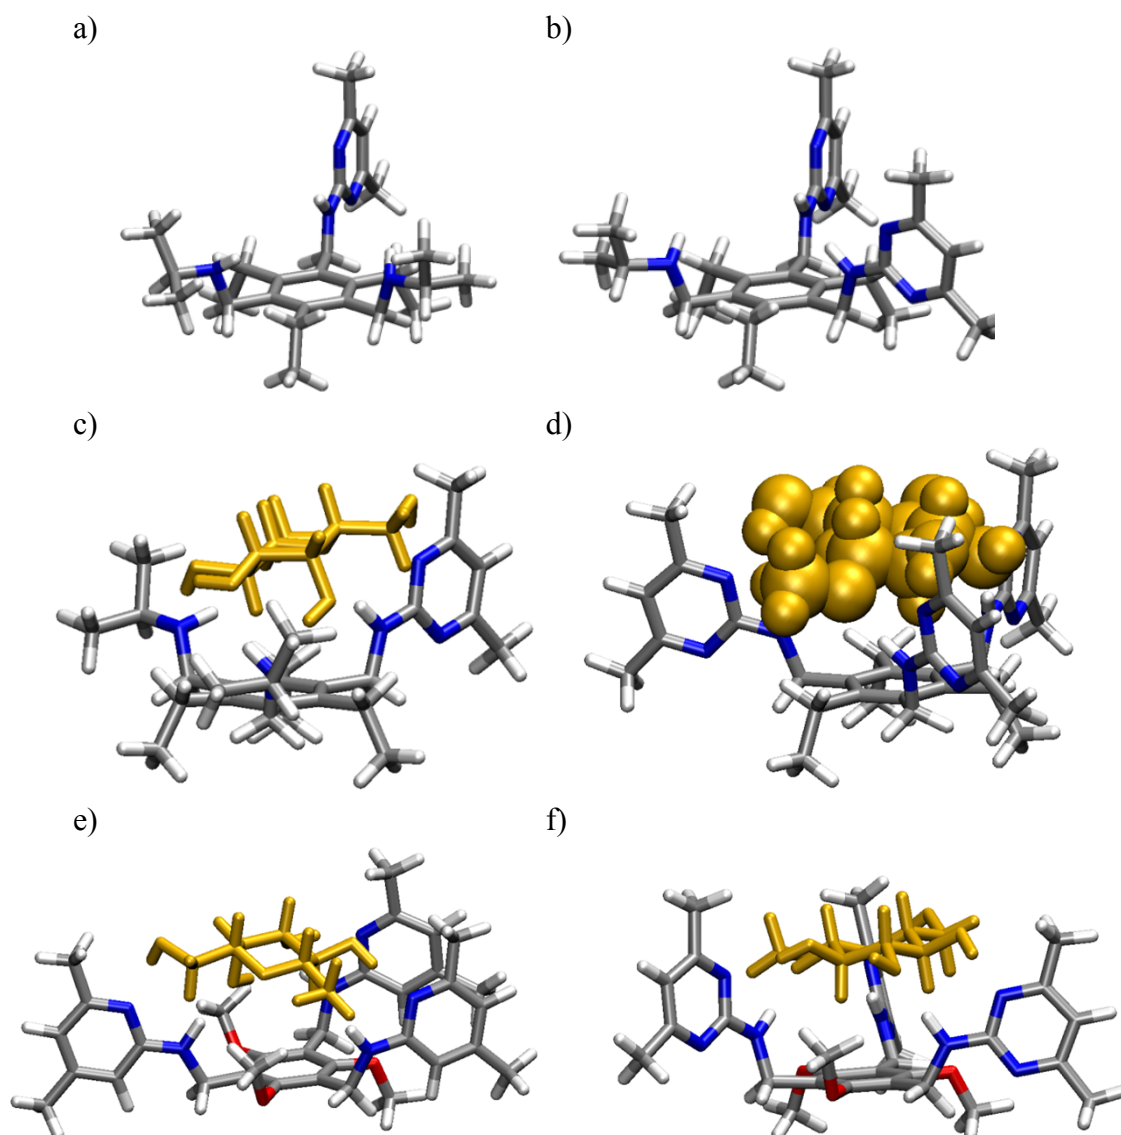

**Figure S15.** Energy-minimized structures of compounds (a) **8** and (b) **10** as well as of the 1:1 complexes (c) **8•24**, (d) **12•22**, (e) **13•23** and (f) **14•22**. MacroModel V.9.8, OPLS\_2001 force field, MCMM, 50000 steps;  $\epsilon = 1$  [F/m]. Color code: receptor N, blue; receptor C, grey; the sugar molecule is highlighted in orange.

## 6 Crystallographic data (Tables S1 and S2, Figure S11).

**Table S1.** Relevant conformational parameters of the receptor molecule in the crystal structure of **12**.

---

|                                        |           |                           |           |
|----------------------------------------|-----------|---------------------------|-----------|
| <i>dihedral angle</i> (°) <sup>a</sup> |           |                           |           |
| mpla(A)···mpla(B)                      | 82.1(1)   | mpla(A')···mpla(B')       | 75.0(1)   |
| mpla(A)···mpla(C)                      | 83.2(1)   | mpla(A')···mpla(C')       | 82.2(1)   |
| mpla(A)···mpla(C)                      | 84.7(1)   | mpla(A')···mpla(C')       | 77.0(1)   |
| mpla(B)···mpla(C)                      | 36.4(1)   | mpla(B')···mpla(C')       | 39.1(1)   |
| mpla(B)···mpla(D)                      | 64.0(1)   | mpla(B')···mpla(D')       | 51.9(1)   |
| mpla(C)···mpla(D)                      | 36.4(1)   | mpla(C')···mpla(D')       | 87.5(1)   |
| <i>torsion angle</i> (°)               |           |                           |           |
| C(1)-C(13)-N(1)-C(14)                  | 168.8(1)  | C(1A)-C(13A)-N(1A)-C(14A) | 170.6(1)  |
| C(3)-C(20)-N(4)-C(21)                  | -127.9(1) | C(3A)-C(20A)-N(4A)-C(21A) | 151.3(1)  |
| C(5)-C(27)-N(7)-C(28)                  | -154.1(1) | C(5A)-C(27A)-N(7A)-C(28A) | -178.9(1) |



**Table S2.** Distances (Å) and Angles (deg) of Non-covalent Interactions of the compound **12**.

| D-H...A<br>Cg...Cg                  | symmetry operator | D...A    | H...A   | D-H...A |                   |
|-------------------------------------|-------------------|----------|---------|---------|-------------------|
| N(1)-H(1)···N(6A)                   | $x, y, z$         | 3.093(2) | 2.21(1) | 176(2)  | Fig. S1/ <b>a</b> |
| N(4)-H(4)···N(5A)                   | $x, y, z$         | 3.230(2) | 2.40(1) | 157(2)  | Fig. S1/ <b>b</b> |
| N(4A)-H(4A)···N(5)                  | $x, y, z$         | 2.992(2) | 2.14(1) | 162(1)  | Fig. S1/ <b>c</b> |
| N(1A)-H(1A)···C(23) <sup>a</sup>    | $x, y, z$         | 3.649(3) | 2.77(1) | 170(2)  |                   |
| N(7)-H(7)···C(23A) <sup>a</sup>     | $x, y, z$         | 3.350(3) | 2.49(1) | 166(2)  | Fig. S1/ <b>d</b> |
| N(7A)-H(7A)···N(2A)                 | $2-x, 2-y, -z$    | 3.263(2) | 2.47(1) | 150(2)  |                   |
| O(1W)-H(1W)···N(8) <sup>c</sup>     | $x, y, z$         | 3.187(3) | 2.34    | 179     | Fig. S1/ <b>e</b> |
| O(1W)-H(2W)···N(9A) <sup>c</sup>    | $x, y, 1+z$       | 3.078(2) | 2.23    | 133     |                   |
| C(7)-H(7AA)···N(6)                  | $x, y, z$         | 3.561(2) | 2.62    | 160     | Fig. S1/ <b>f</b> |
| C(7A)-H(7AD)···N(1A)                | $x, y, z$         | 3.352(2) | 2.62    | 131     | Fig. S1/ <b>g</b> |
| C(19)-H(19B)···N(6)                 | $1+x, y, z$       | 3.504(3) | 2.58    | 158     |                   |
| C(19A)-H(19F)···O(1W)               | $1-x, 2-y, 1-z$   | 3.363(3) | 2.62    | 133     |                   |
| C(20A)-H(20C)···N(2)                | $x, y, z$         | 3.370(2) | 2.69    | 127     |                   |
| C(16)-H(16)···Cg(C) <sup>b</sup>    | $1+x, y, z$       | 3.633(3) | 2.78    | 150     |                   |
| C(19)-H(19C)···Cg(A) <sup>b</sup>   | $2-x, 2-y, 1-z$   | 3.452(3) | 2.60    | 145     |                   |
| C(26)-H(26B)···N(3A)                | $x, y, z$         | 3.551(2) | 2.58    | 171     | Fig. S1/ <b>h</b> |
| C(11A)-H(11C)···N(7A)               | $x, y, z$         | 3.217(2) | 2.51    | 128     | Fig. S1/ <b>i</b> |
| C(30A)-H(30A)···Cg(C') <sup>b</sup> | $2-x, 1-y, -z$    | 3.758(3) | 2.82    | 169     |                   |
| Cg(A)···Cg(C') <sup>b</sup>         | $x, y, z$         | 3.791(2) |         |         | Fig. S1/ <b>j</b> |

<sup>a</sup> In order to obtain a reasonable hydrogen bond geometry an individual atom instead of the center of the aromatic ring was chosen as an acceptor.

<sup>b</sup> Cg means the centroid of the aromatic ring. Ring A: C(1)...C(6); ring C: N(5),N(6),C(21)...C(24); ring C': N(5A),N(6A),C(21A)...C(24A).

<sup>c</sup> The water hydrogen atoms were included in the model in positions which allow reasonable hydrogen bond geometries.

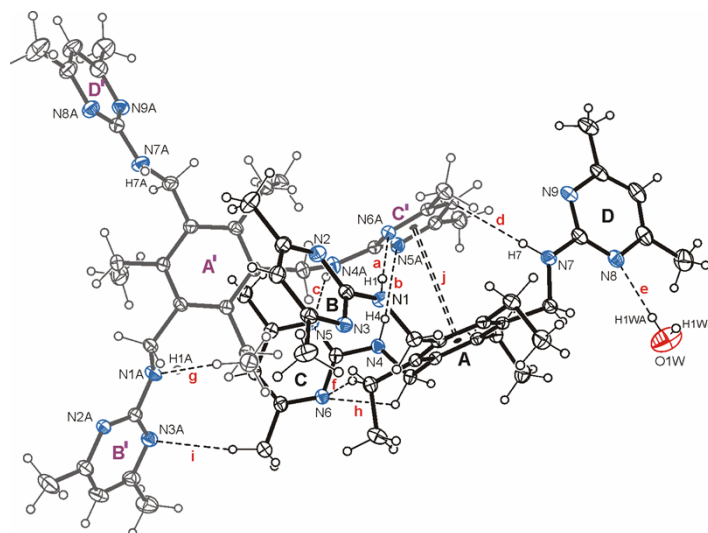

**Figure S16.** Perspective view of the molecular structure **1**•H<sub>2</sub>O (2:1). The aromatic rings of one molecule are marked as A-D, whereas those of the second molecule as A'-D'; the distances and angles of the noncovalent interactions **a-j** are given in Table S2. The thermal ellipsoids are drawn at the 50% probability level. Nitrogen atoms are displayed as blue, the oxygen atom as red ellipsoids. Dashed lines represent hydrogen bonds, dashed double lines  $\pi \cdots \pi$  are arene stacking.

7.  $^1\text{H}$  and  $^{13}\text{C}$  NMR spectra of compounds **8-10** and **12-14** (Figures S12-27).

7.1  $^1\text{H}$  and  $^{13}\text{C}$  NMR spectra of compound **8**.

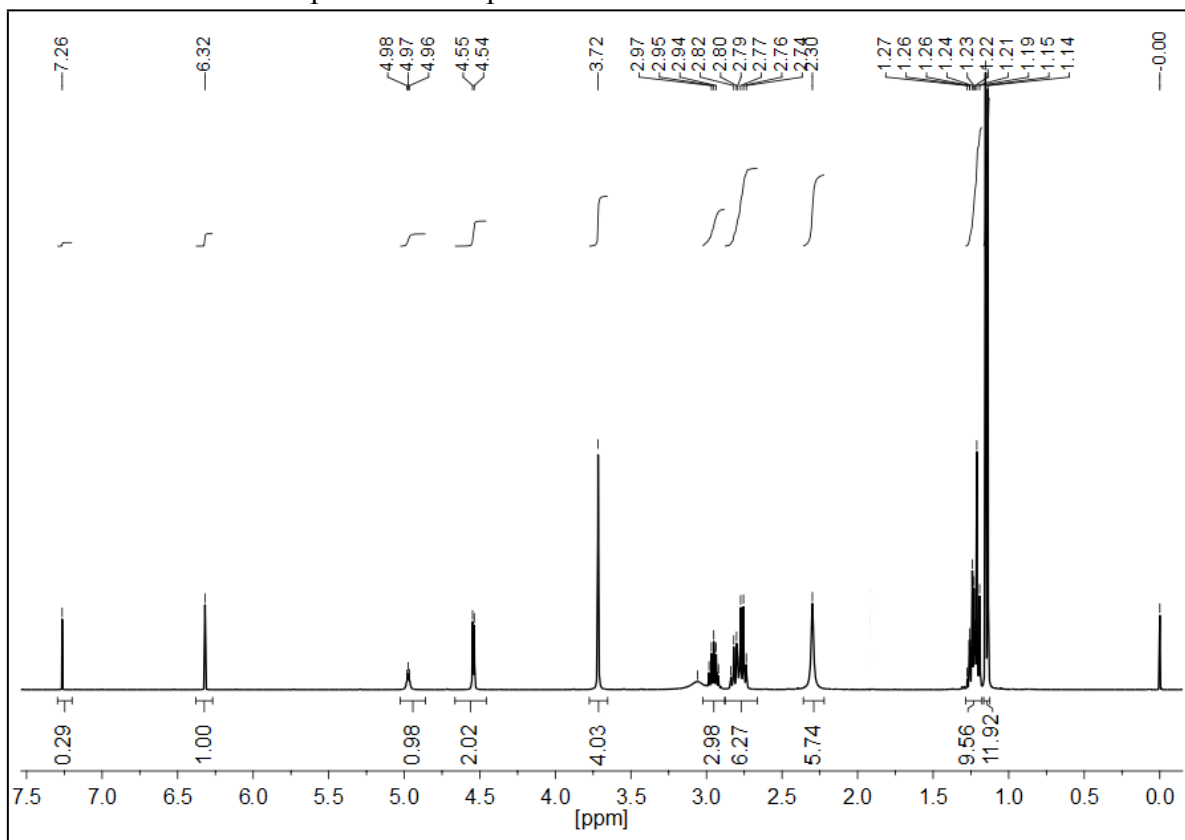

Figure S17.  $^1\text{H}$  NMR spectrum of **8** in  $\text{CDCl}_3$  (0.03 M).

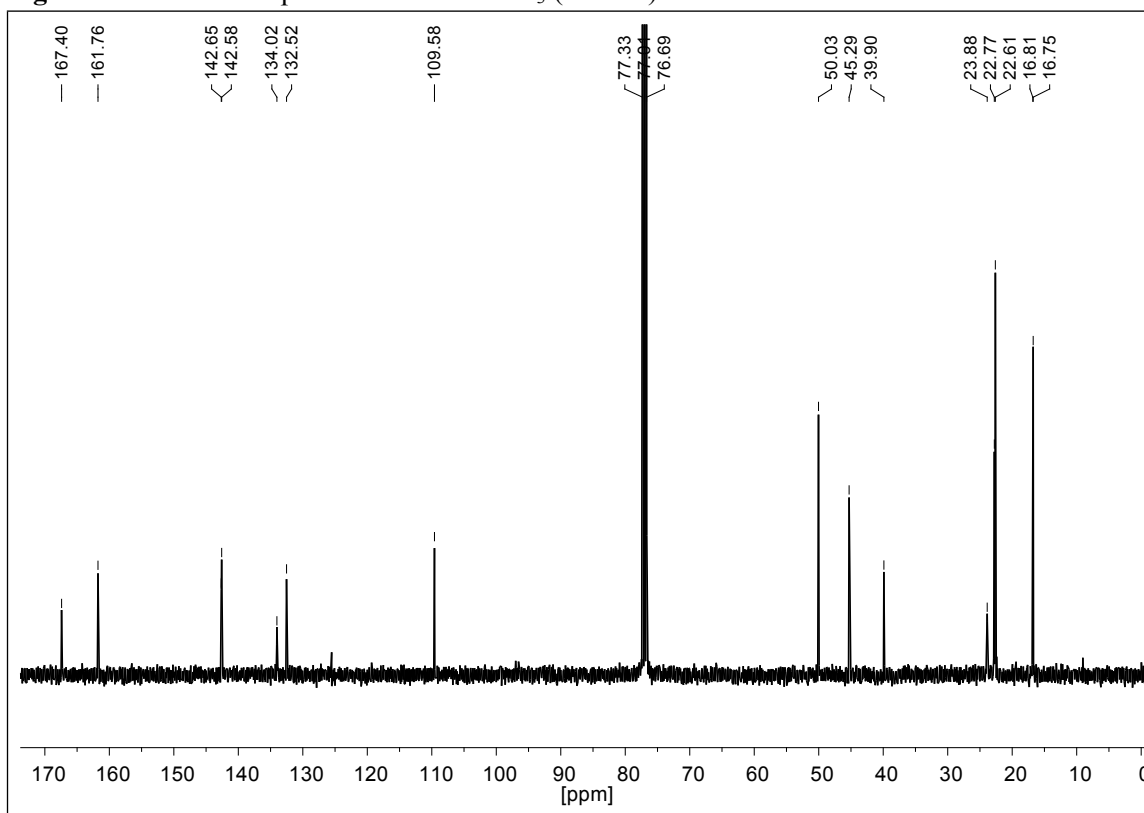

Figure S18.  $^{13}\text{C}$  NMR spectrum of **8** in  $\text{CDCl}_3$ .

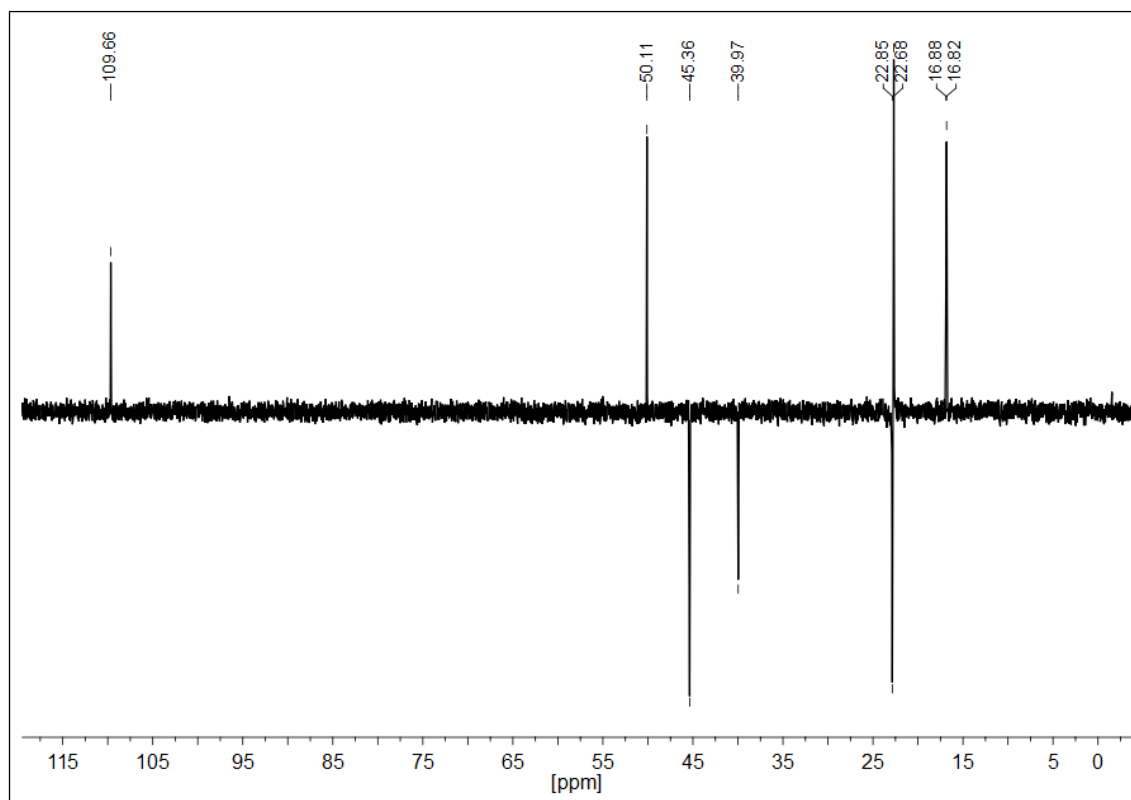

**Figure S19.** DEPT spectrum of **8** in  $\text{CDCl}_3$ .

## 7.2 $^1\text{H}$ and $^{13}\text{C}$ NMR spectra of compound **9**.

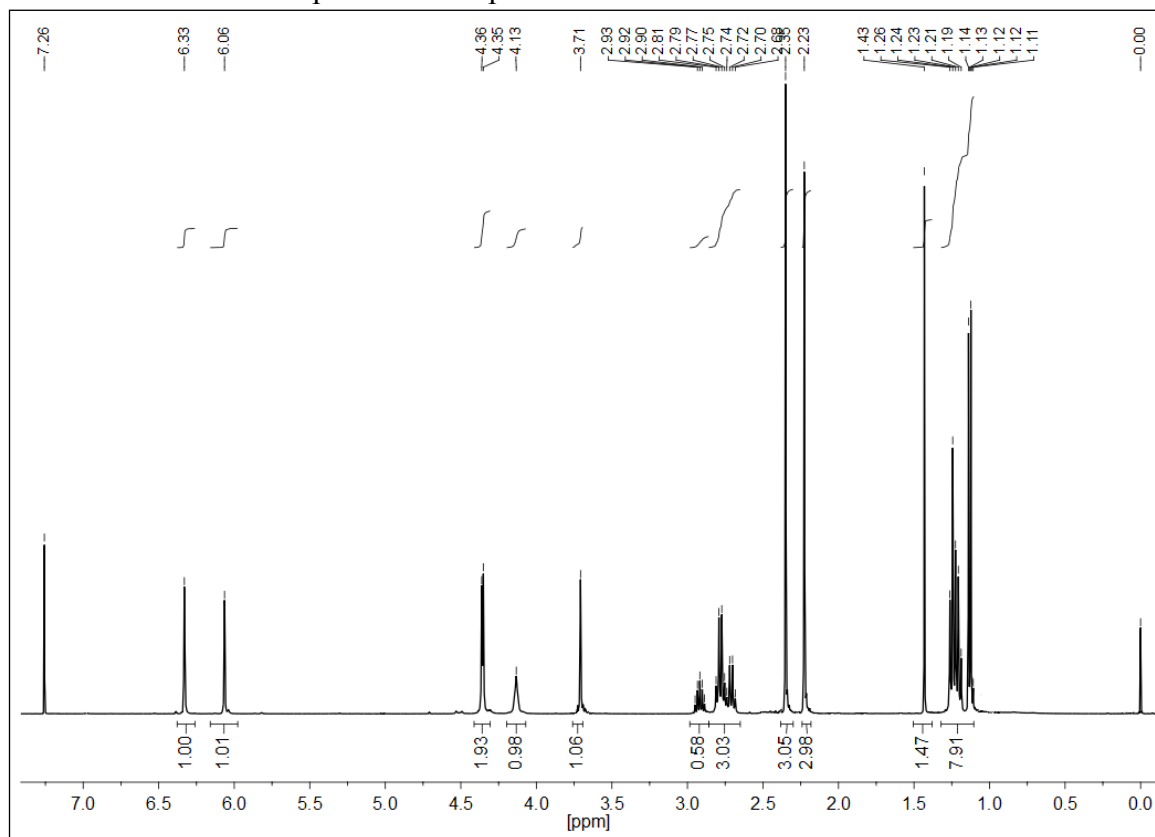

**Figure S20.**  $^1\text{H}$  NMR spectrum of **9** in  $\text{CDCl}_3$  (0.04 M).

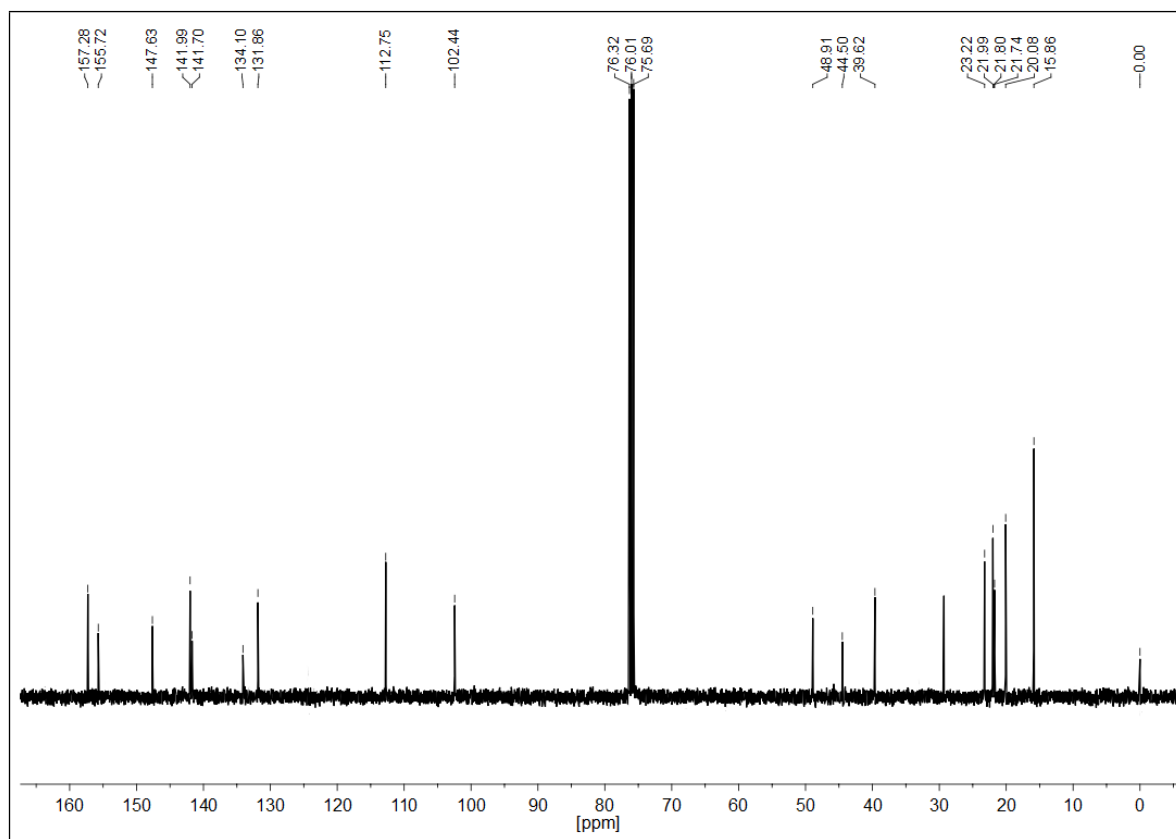

**Figure S21.**  $^{13}\text{C}$  NMR spectrum of **9** in  $\text{CDCl}_3$ .

### 7.3 $^1\text{H}$ and $^{13}\text{C}$ NMR spectra of compound **10**.

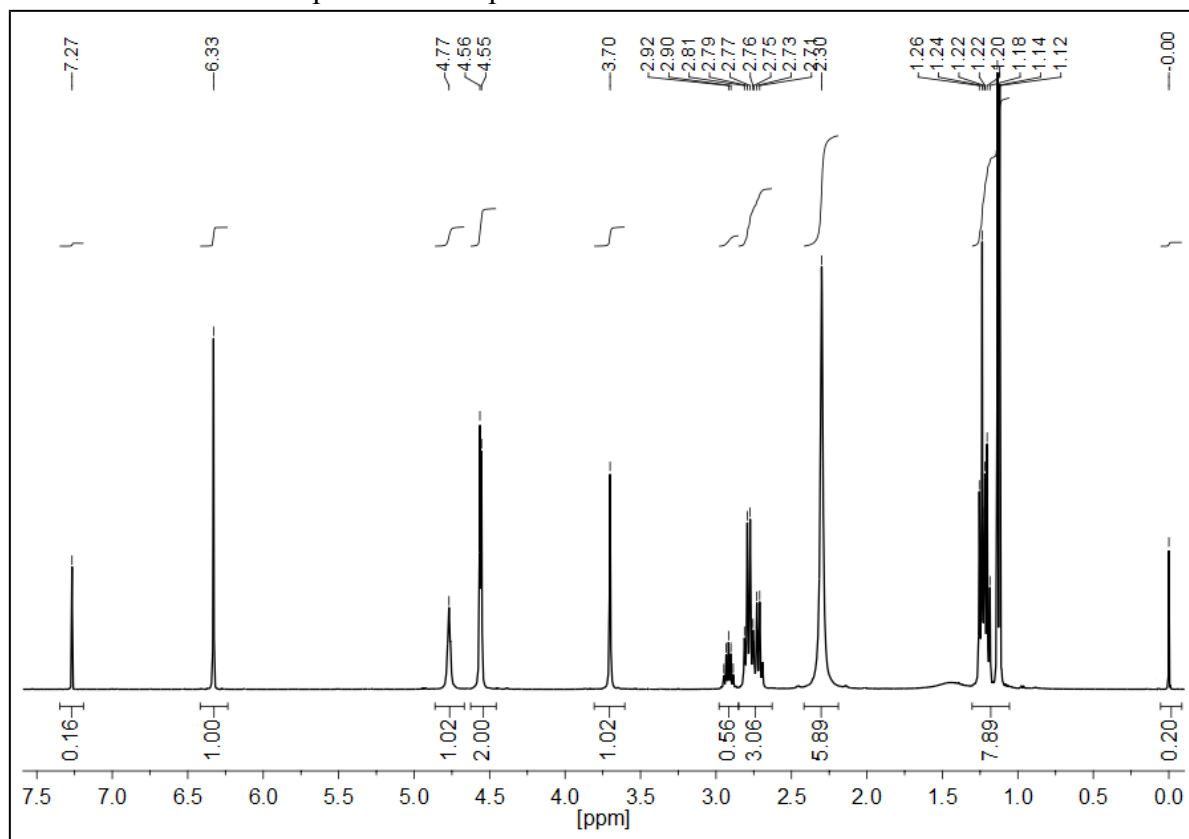

**Figure S22.**  $^1\text{H}$  NMR spectrum of **10** in  $\text{CDCl}_3$  (0.03 M).

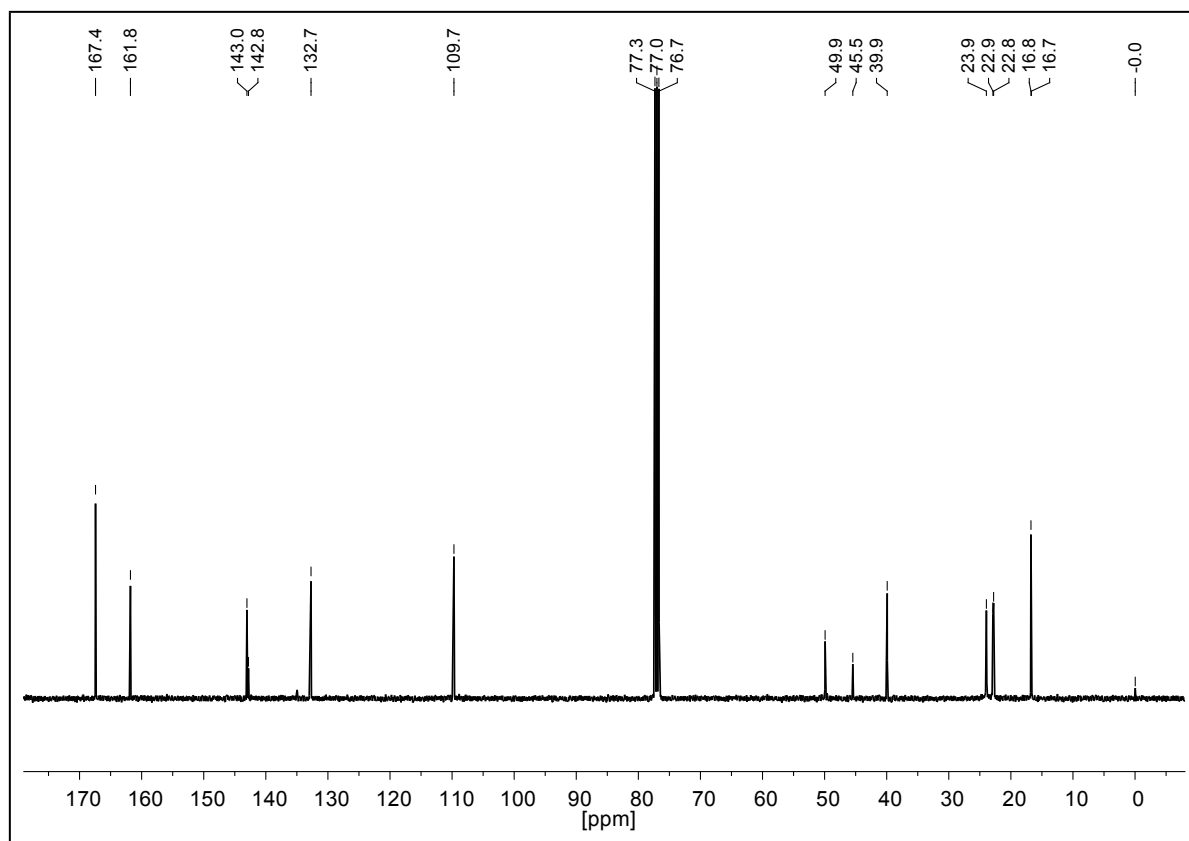

**Figure S23.**  $^{13}\text{C}$  NMR spectrum of **10** in  $\text{CDCl}_3$ .

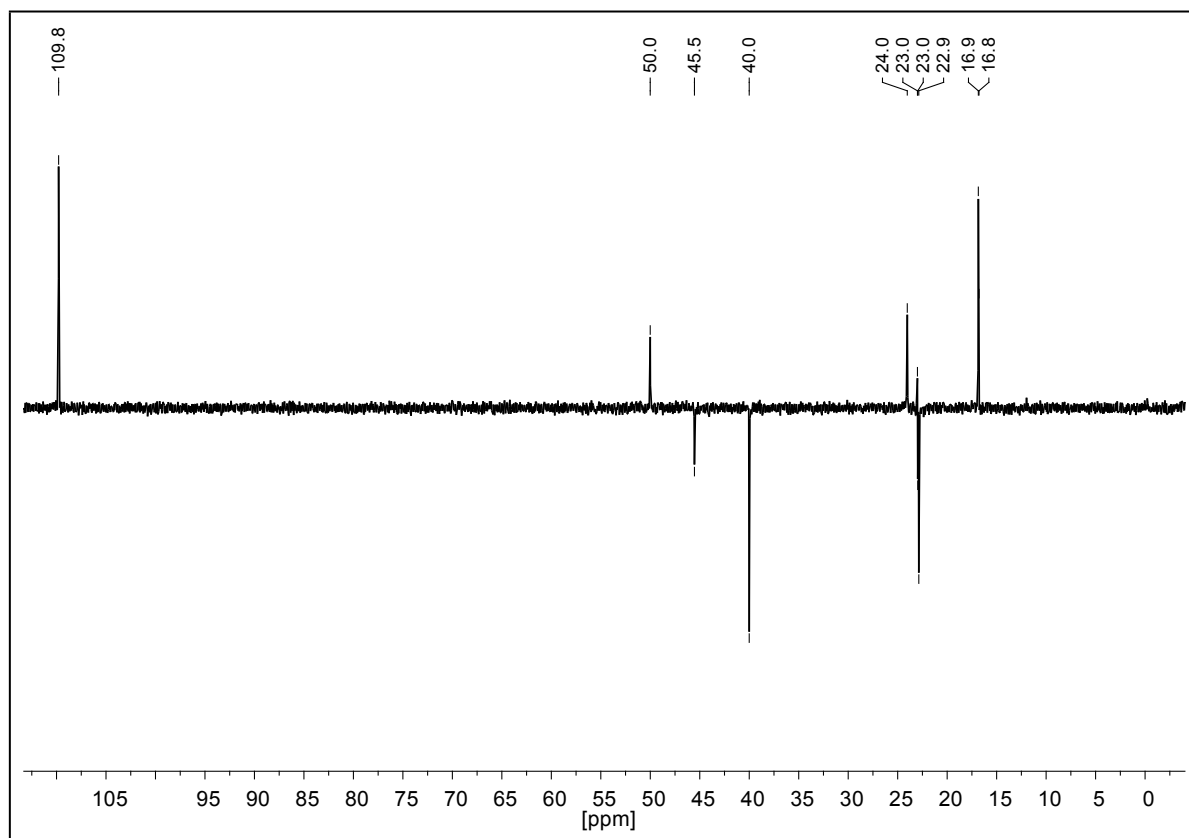

**Figure S24.** DEPT spectrum of **10** in  $\text{CDCl}_3$ .

7.4  $^1\text{H}$  and  $^{13}\text{C}$  NMR spectra of compound **12**.

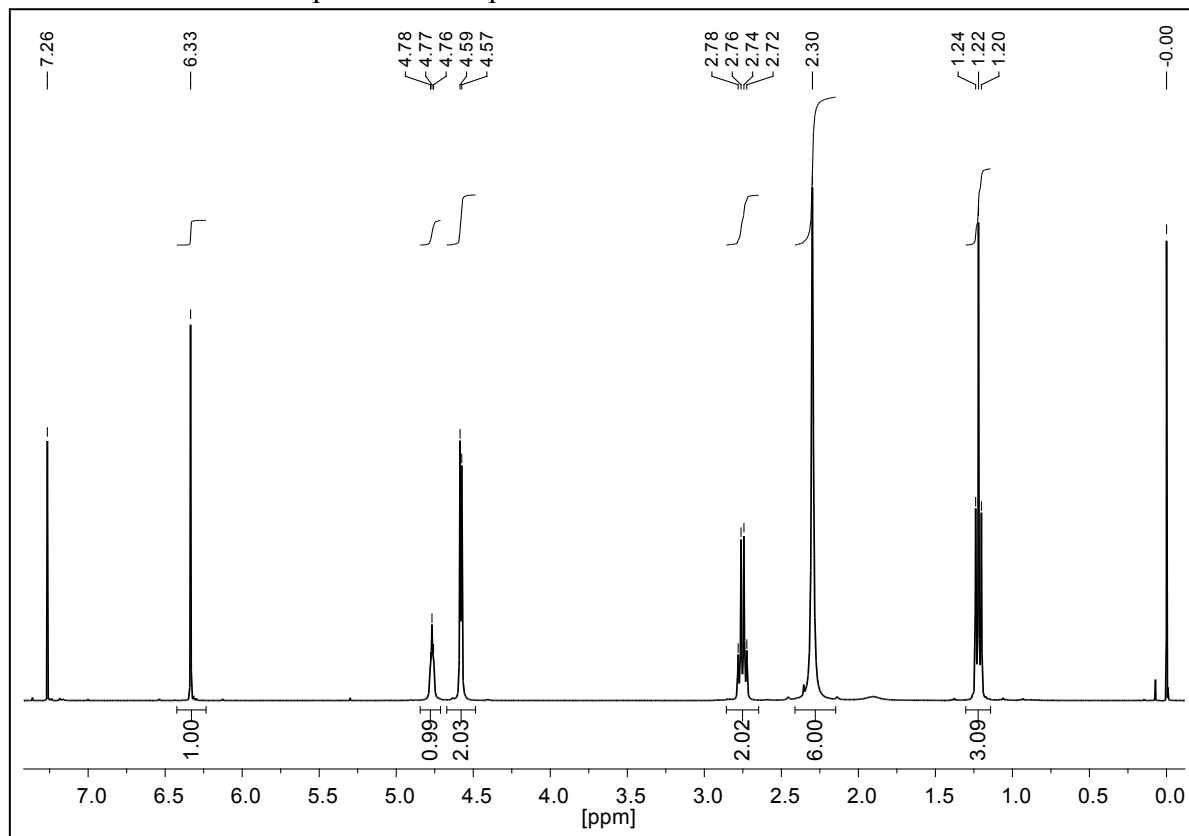

Figure S25.  $^1\text{H}$  NMR spectrum of **12** in  $\text{CDCl}_3$  (0.06 M).

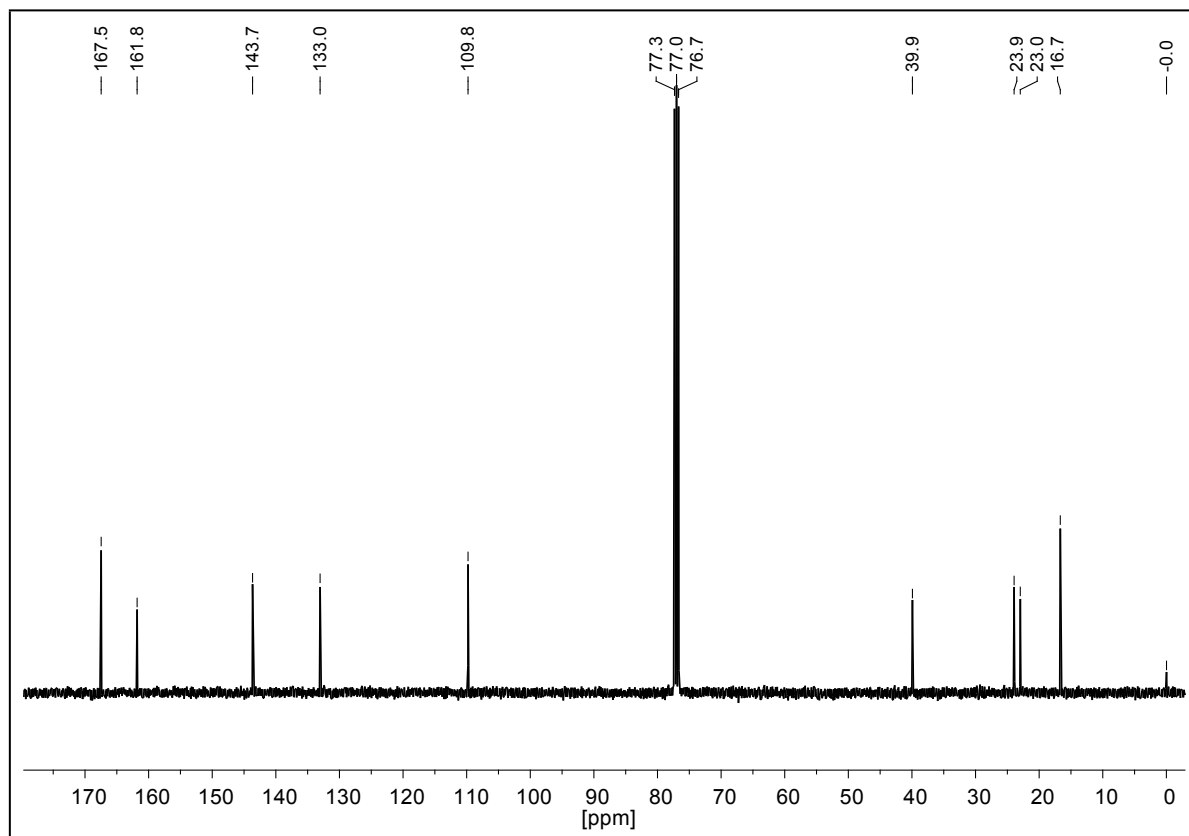

Figure S26.  $^{13}\text{C}$  NMR spectrum of **12** in  $\text{CDCl}_3$ .

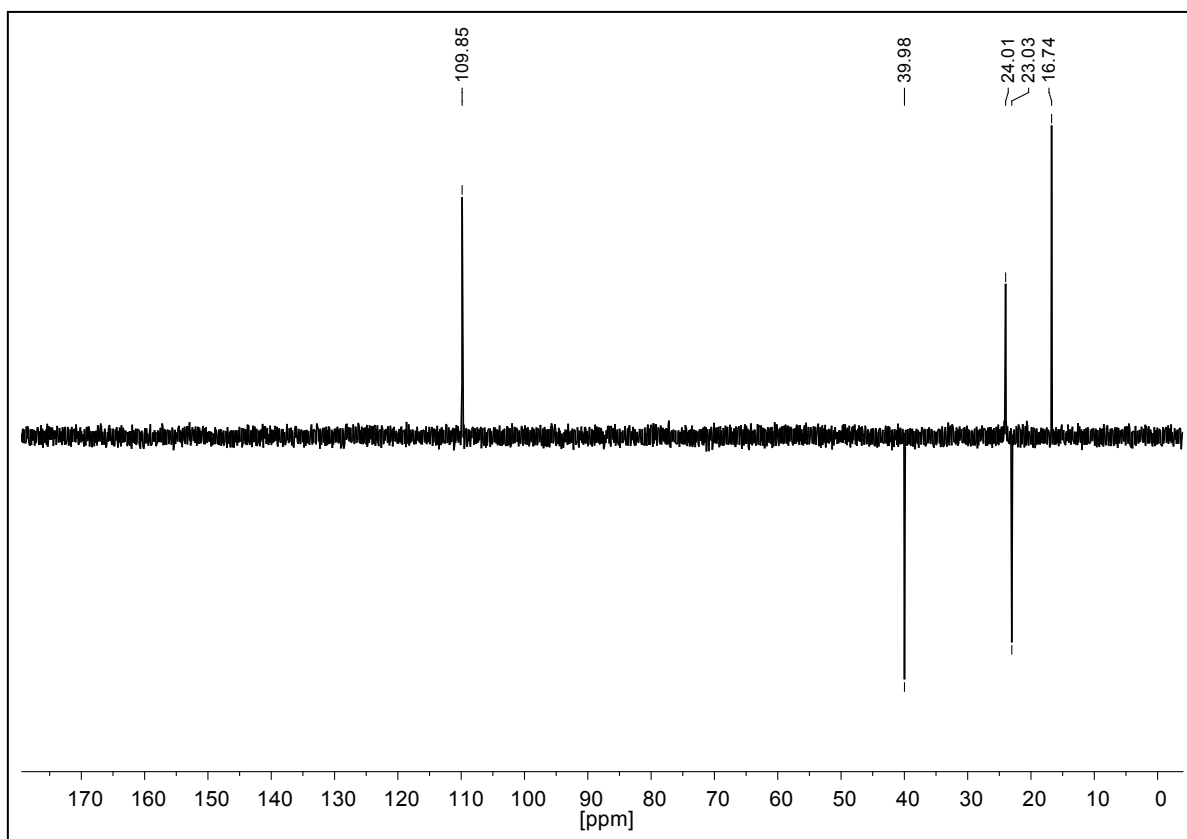

**Figure S27.** DEPT spectrum of **12** in  $\text{CDCl}_3$ .

### 7.5 $^1\text{H}$ and $^{13}\text{C}$ NMR spectra of compound **13**.

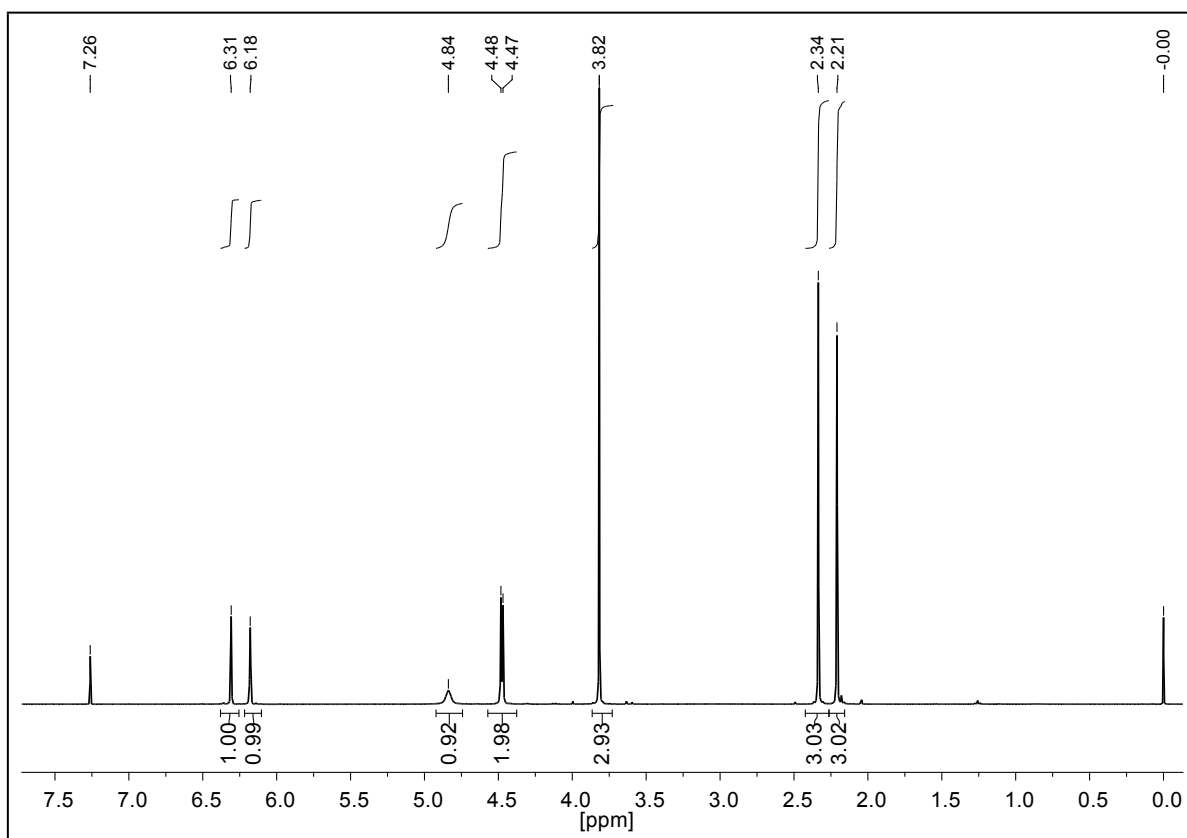

**Figure S28.**  $^1\text{H}$  NMR spectrum of **13** in  $\text{CDCl}_3$  (0.03 M).

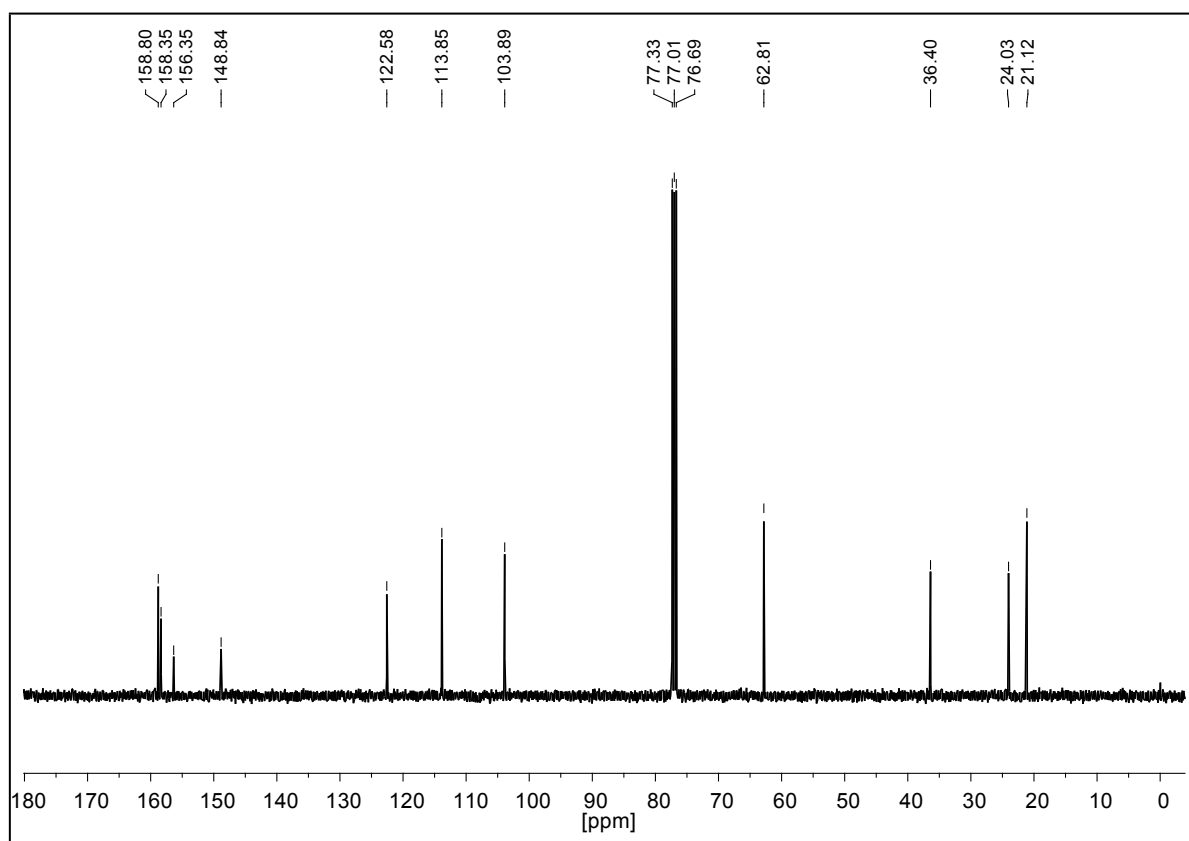

**Figure S29.**  $^{13}\text{C}$  NMR spectrum of **13** in  $\text{CDCl}_3$ .

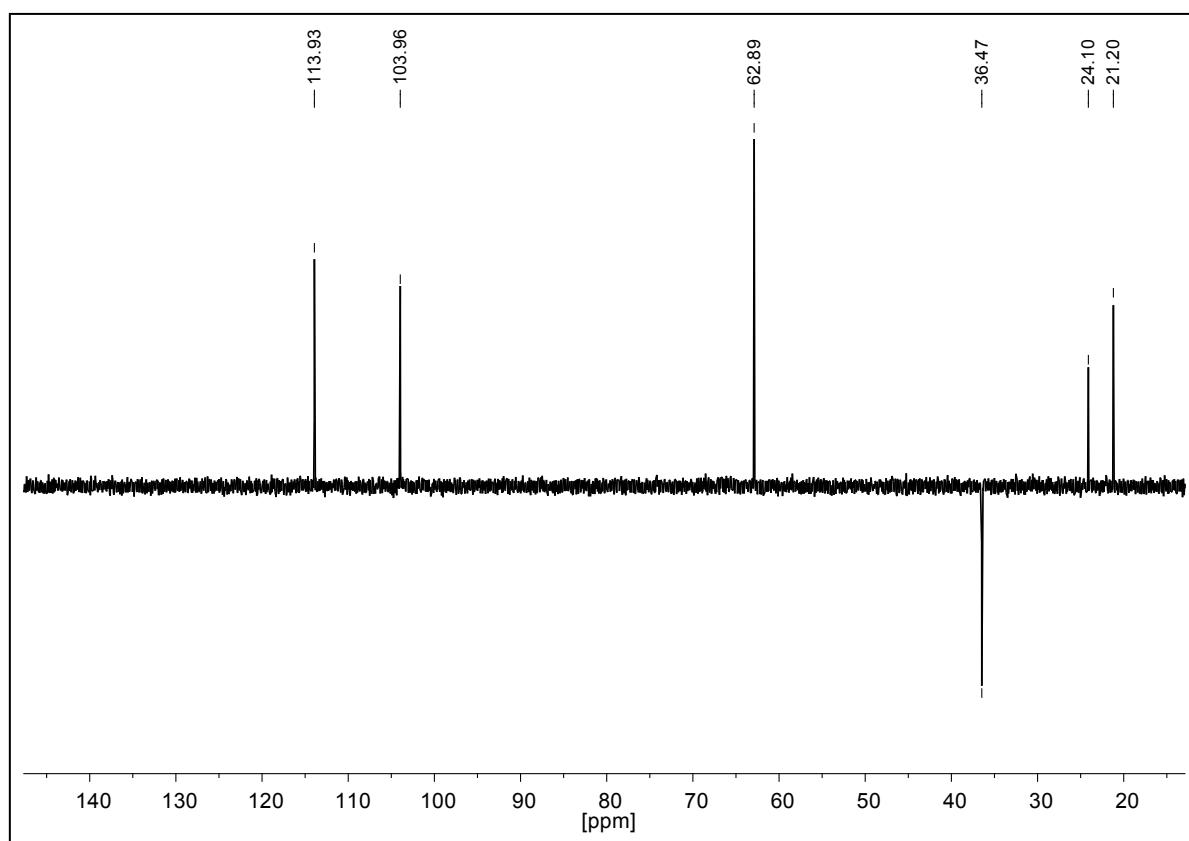

**Figure S30.** DEPT spectrum of **13** in  $\text{CDCl}_3$ .



**7.6**  $^1\text{H}$  and  $^{13}\text{C}$  NMR spectra of compound **14**.

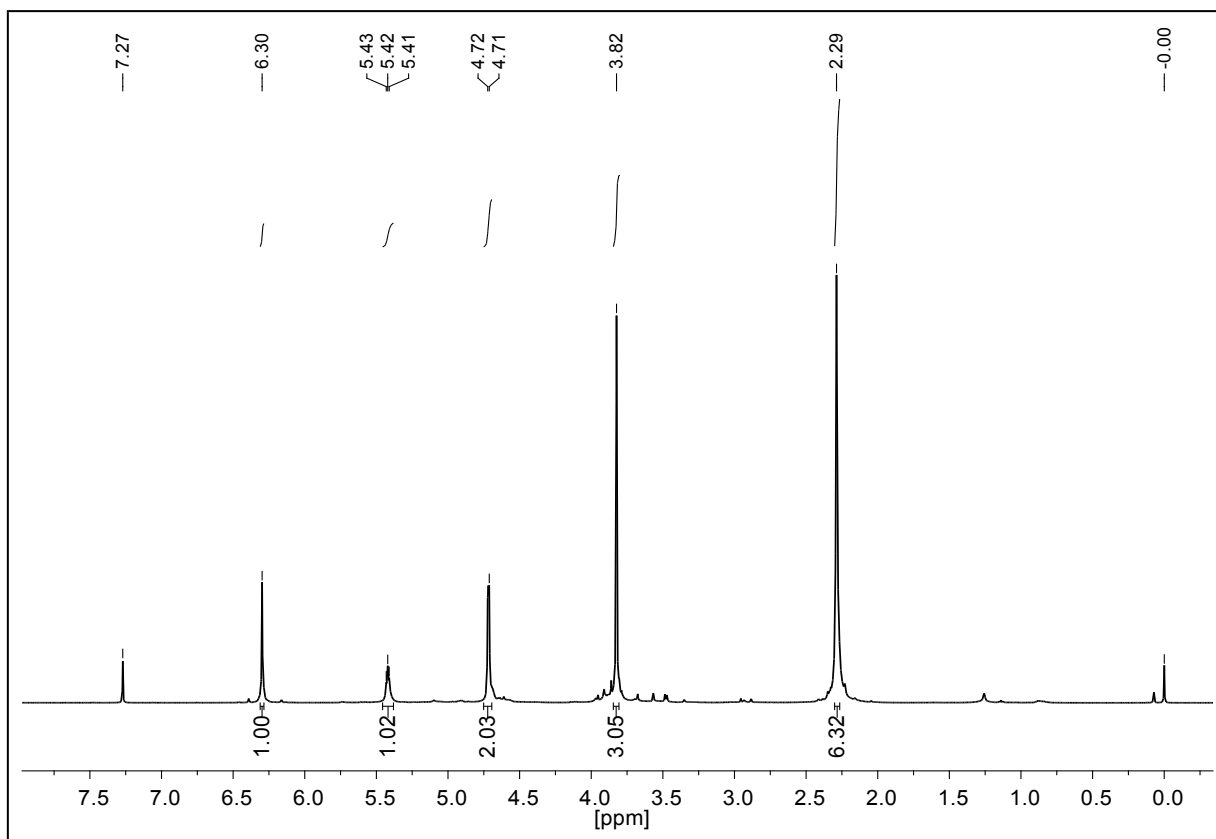

**Figure S31.**  $^1\text{H}$  NMR spectrum of **14** in  $\text{CDCl}_3$  (0.02 M).

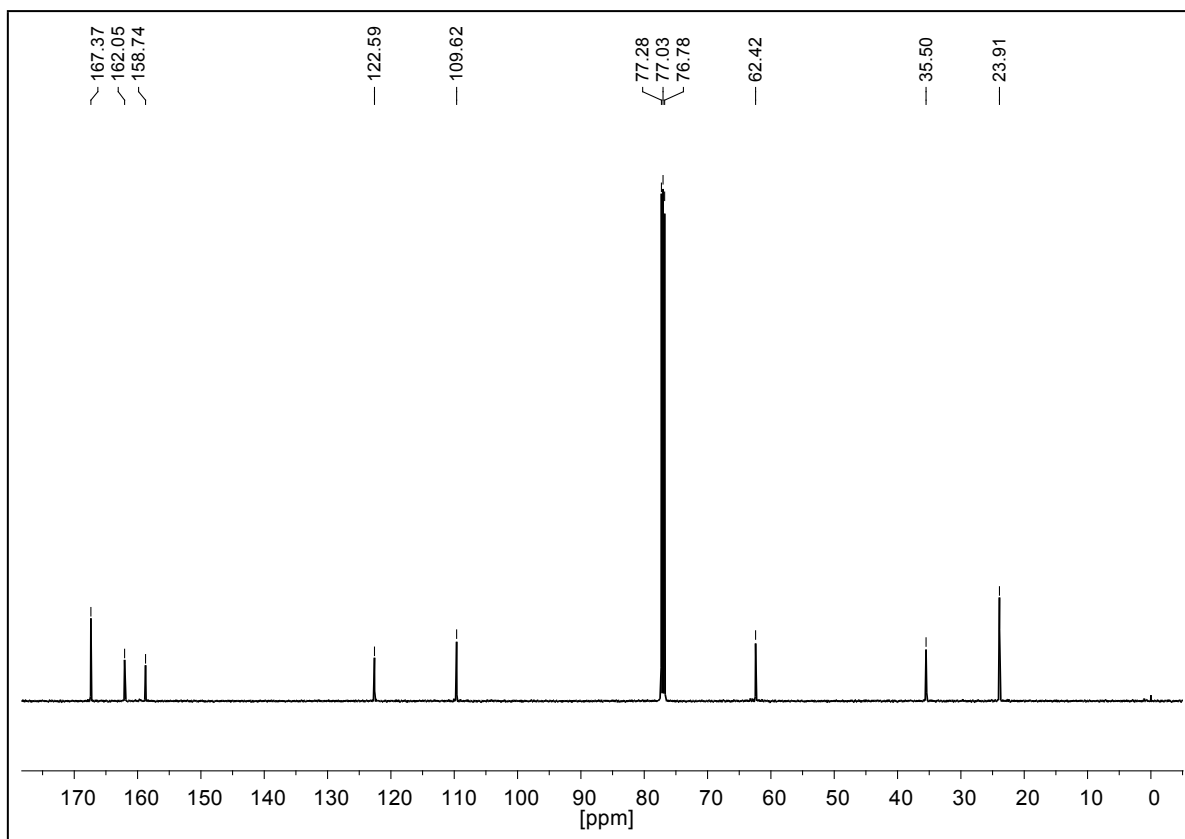

**Figure S32.**  $^{13}\text{C}$  NMR spectrum of **14** in  $\text{CDCl}_3$ .
